# Supplementary material for: Use of Telehealth Across Pediatric Subspecialties Before and During the COVID-19 Pandemic
Source: PubMed Central journal article supplement (PMC8972035; doi:10.1001/jamanetworkopen.2022.4759), 2022-03-31
Supplement: jamanetwopen-e224759-s001.pdf [file jamanetwopen-e224759-s001.pdf]

## Supplementary Online Content

Uscher-Pines L, McCullough C, Dworsky MS, et al. Use of telehealth across pediatric subspecialties before and during the COVID-19 pandemic. *JAMA Netw Open*. 2022;5(3):e224759. doi:10.1001/jamanetworkopen.2022.4759

**eTable 1.** Details on Missing Data

**eTable 2.** Patient Characteristics of Genetics and Behavioral Health Visits During the Pre-Pandemic and Pandemic Periods

**eFigure 1.** Genetics Visits per 1,000 Patients by Modality

**eFigure 2.** Behavioral Health Visits per 1,000 Patients by Modality

**eFigure 3.** Orthopedics Visits per 1,000 Patients by Modality

This supplementary material has been provided by the authors to give readers additional information about their work.

**eTable 1.** Details on Missing Data

| <b>Specialty</b>  | <b>Months of Data Available by Medical Group (Total of 28)</b> |          |          |          |          |          |           |          |
|-------------------|----------------------------------------------------------------|----------|----------|----------|----------|----------|-----------|----------|
|                   | <b>1</b>                                                       | <b>2</b> | <b>3</b> | <b>4</b> | <b>5</b> | <b>6</b> | <b>7*</b> | <b>8</b> |
| Behavioral Health | 28                                                             | 12       | 28       | 0        | 28       | 28       | 22        | 28       |
| Cardiology        | 28                                                             | 28       | 28       | 28       | 28       | 28       | 22        | 28       |
| Dermatology       | 28                                                             | 0        | 0        | 0        | 28       | 28       | 22        | 28       |
| Endocrinology     | 28                                                             | 28       | 28       | 8        | 28       | 28       | 22        | 28       |
| Gastroenterology  | 28                                                             | 28       | 28       | 28       | 28       | 28       | 22        | 28       |
| Genetics          | 28                                                             | 0        | 0        | 28       | 28       | 28       | 22        | 28       |
| Nephrology        | 28                                                             | 28       | 28       | 28       | 28       | 28       | 22        | 28       |
| Neurology         | 28                                                             | 28       | 0        | 28       | 28       | 28       | 22        | 28       |
| Orthopedics       | 28                                                             | 16       | 0        | 0        | 28       | 28       | 22        | 0        |
| Pulmonology       | 28                                                             | 28       | 8        | 28       | 28       | 28       | 22        | 28       |
| Urology           | 28                                                             | 16       | 0        | 0        | 28       | 28       | 22        | 0        |

\*Data available from July 2019-April 2021 (22 months total); data included in overall visit trend figures that focused on July 2019-April 2021

**eTable 2.** Patient Characteristics of Genetics and Behavioral Health Visits During the Pre-Pandemic and Pandemic Periods

| Characteristic              | Visits, No. (%)                     |                        |              | P value                               |                                          |        |
|-----------------------------|-------------------------------------|------------------------|--------------|---------------------------------------|------------------------------------------|--------|
|                             | Pre-Pandemic visits (all in-person) | Pandemic period visits |              | Pre-pandemic total vs. pandemic total | Pandemic period in-person vs. telehealth |        |
|                             | All                                 | In-person              | Telehealth   |                                       |                                          |        |
| <b>Genetics</b>             |                                     |                        |              |                                       |                                          |        |
| <b>Overall</b>              | 9,099                               | 9,132                  | 2,467 (27.0) | 6,665 (73.0)                          | NA                                       | NA     |
| <b>Race</b>                 |                                     |                        |              |                                       |                                          |        |
| White                       | 3,162 (34.8)                        | 3,126 (34.2)           | 867 (35.1)   | 2,259 (33.9)                          | 0.5268                                   | 0.0024 |
| Black                       | 221 (2.4)                           | 198 (2.2)              | 75 (3.0)     | 123 (1.8)                             |                                          |        |
| Asian                       | 691 (7.6)                           | 692 (7.6)              | 180 (7.3)    | 512 (7.7)                             |                                          |        |
| Other/Not reported          | 5,025 (55.2)                        | 5,116 (56.0)           | 1,345 (54.5) | 3,771 (56.6)                          |                                          |        |
| <b>Ethnicity</b>            |                                     |                        |              |                                       |                                          |        |
| Hispanic                    | 3,420 (37.6)                        | 3,314 (36.3)           | 1,087 (44.1) | 2,227 (33.4)                          | <.01                                     | <.01   |
| Non-Hispanic                | 4,375 (48.1)                        | 4,302 (47.1)           | 1,045 (42.4) | 3,257 (48.9)                          |                                          |        |
| Other/Not reported          | 1,304 (14.3)                        | 1,516 (16.6)           | 335 (13.6)   | 1,181 (17.7)                          |                                          |        |
| <b>Preferred Language</b>   |                                     |                        |              |                                       |                                          |        |
| English                     | 6,376 (79.3)                        | 6,615 (81.8)           | 1,830 (74.9) | 4,785 (84.8)                          | <.01                                     | <.01   |
| Language other than English | 1,633 (20.3)                        | 1,427 (17.6)           | 614 (25.1)   | 813 (14.4)                            |                                          |        |
| Other/Not reported          | 28 (0.3)                            | 43 (0.5)               | 0 (0.0)      | 43 (0.8)                              |                                          |        |
| <b>Age</b>                  |                                     |                        |              |                                       |                                          |        |
| ≤35 months                  | 2,806 (30.8)                        | 2,834 (31.0)           | 889 (36.0)   | 1,945 (29.1)                          | 0.0446                                   | <.01   |
| 3 – ≤5 years                | 1,536 (16.9)                        | 1,506 (16.5)           | 409 (16.6)   | 1,097 (16.4)                          |                                          |        |
| 6 – ≤12 years               | 2,281 (25.1)                        | 2,198 (24.0)           | 621 (25.2)   | 1,577 (23.6)                          |                                          |        |
| 13 – ≤17 years              | 1,184 (13.0)                        | 1,254 (13.7)           | 385 (15.6)   | 869 (13.0)                            |                                          |        |
| 18+ years                   | 1,292 (14.2)                        | 1,356 (14.8)           | 163 (6.6)    | 1,193 (17.8)                          |                                          |        |
| Other/Not reported          | 0 (0.0)                             | 6 (0.1)                | 0 (0.0)      | 6 (0.1)                               |                                          |        |
| <b>Payer</b>                |                                     |                        |              |                                       |                                          |        |
| None/uninsured              | 844 (9.3)                           | 118 (1.3)              | 25 (1.0)     | 93 (1.4)                              | <.01                                     | <.01   |
| Medi-Cal/CCS                | 3,754 (41.3)                        | 4,222 (46.2)           | 1,396 (56.6) | 2,826 (42.4)                          |                                          |        |
| Other government insurance  | 392 (4.3)                           | 474 (5.2)              | 148 (6.0)    | 326 (4.9)                             |                                          |        |
| Private/commercial          | 4,098 (45.0)                        | 4,290 (47.0)           | 896 (36.3)   | 3,394 (50.9)                          |                                          |        |
| Other/Not reported          | 11 (0.1)                            | 28 (0.3)               | 2 (0.1)      | 26 (0.4)                              |                                          |        |
| <b>Behavioral Health</b>    |                                     |                        |              |                                       |                                          |        |
| <b>Overall</b>              | 36,869                              | 27,438                 | 9,445 (34.4) | 17,993 (65.6)                         | NA                                       | NA     |
| <b>Race</b>                 |                                     |                        |              |                                       |                                          |        |
| White                       | 15,746 (42.7)                       | 11,610 (42.3)          | 4,185 (44.3) | 7,425 (41.3)                          | <.01                                     | <.01   |
| Black                       | 1,955 (5.3)                         | 1,223 (4.5)            | 418 (4.4)    | 805 (4.5)                             |                                          |        |
| Asian                       | 1,634 (4.4)                         | 1,796 (6.5)            | 411 (4.4)    | 1,385 (7.7)                           |                                          |        |
| Other/Not reported          | 17,534 (47.6)                       | 12,809 (46.7)          | 4,431 (46.9) | 8,378 (46.6)                          |                                          |        |
| <b>Ethnicity</b>            |                                     |                        |              |                                       |                                          |        |
| Hispanic                    | 17,404 (47.2)                       | 10,219 (37.2)          | 4,950 (52.4) | 5,269 (29.3)                          | <.01                                     | <.01   |
| Non-Hispanic                | 16,236 (44.0)                       | 12,516 (45.6)          | 3,653 (38.7) | 8,863 (49.3)                          |                                          |        |
| Other/Not reported          | 3,229 (8.8)                         | 4,703 (17.1)           | 842 (8.9)    | 3,861 (21.5)                          |                                          |        |

|                             |               |               |              |               |      |      |
|-----------------------------|---------------|---------------|--------------|---------------|------|------|
| <b>Preferred Language</b>   |               |               |              |               |      |      |
| English                     | 29,015 (78.7) | 22,886 (83.4) | 7,208 (76.3) | 15,678 (87.1) | <.01 | <.01 |
| Language other than English | 7,821 (21.2)  | 4,462 (16.3)  | 2,217 (23.5) | 2,245 (12.5)  |      |      |
| Other/Not reported          | 32 (0.1)      | 89 (0.3)      | 20 (0.2)     | 69 (0.4)      |      |      |
| <b>Age</b>                  |               |               |              |               |      |      |
| ≤35 months                  | 2,778 (7.5)   | 2,856 (10.4)  | 617 (6.5)    | 2,239 (12.4)  | <.01 | <.01 |
| 3 - ≤5 years                | 3,142 (8.5)   | 3,094 (11.3)  | 687 (7.3)    | 2,407 (13.4)  |      |      |
| 6 - ≤12 years               | 16,484 (44.7) | 11,262 (41.0) | 4,066 (43.0) | 7,196 (40.0)  |      |      |
| 13 - ≤17 years              | 12,837 (34.8) | 8,804 (32.1)  | 3,640 (38.5) | 5,164 (28.7)  |      |      |
| 18+ years                   | 1,628 (4.4)   | 1,422 (5.2)   | 435 (4.6)    | 987 (5.5)     |      |      |
| Other/Not reported          | 0 (0.0)       | 0 (0.0)       | 0 (0.0)      | 0 (0.0)       |      |      |
| <b>Payer</b>                |               |               |              |               |      |      |
| None/uninsured              | 18,652 (50.6) | 4,357 (15.9)  | 3,689 (39.1) | 668 (3.7)     | <.01 | <.01 |
| Medi-Cal/CCS                | 7,258 (19.7)  | 6,191 (22.6)  | 2,040 (21.6) | 4,151 (23.1)  |      |      |
| Other government insurance  | 1,177 (3.2)   | 1,282 (4.7)   | 211 (2.2)    | 1,071 (6.0)   |      |      |
| Private/commercial          | 9,368 (25.4)  | 12,439 (45.3) | 1,814 (19.2) | 10,625 (59.1) |      |      |
| Other/Not reported          | 414 (1.1)     | 3,169 (11.5)  | 1,691 (17.9) | 1,478 (8.2)   |      |      |

**eFigure 1.** Genetics Visits per 1,000 Patients by Modality

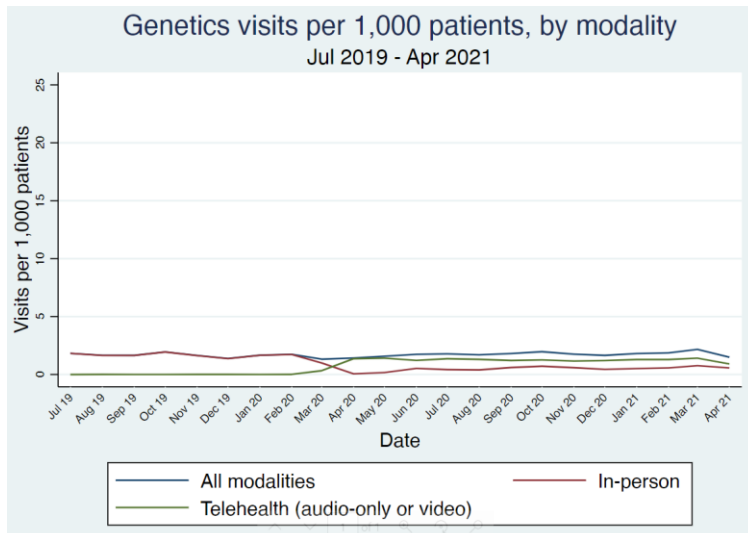

\*Genetics visits reported by 6/8 organizations, denominator = 496,609

**eFigure 2.** Behavioral Health Visits per 1,000 Patients by Modality

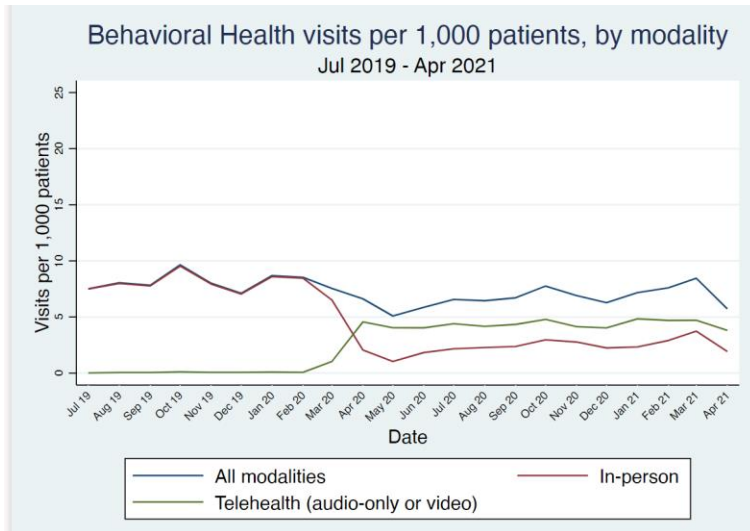

\*Behavioral Health visits reported by 5/8 organizations, denominator = 479,730

**eFigure 3. Orthopedics Visits per 1,000 Patients by Modality**

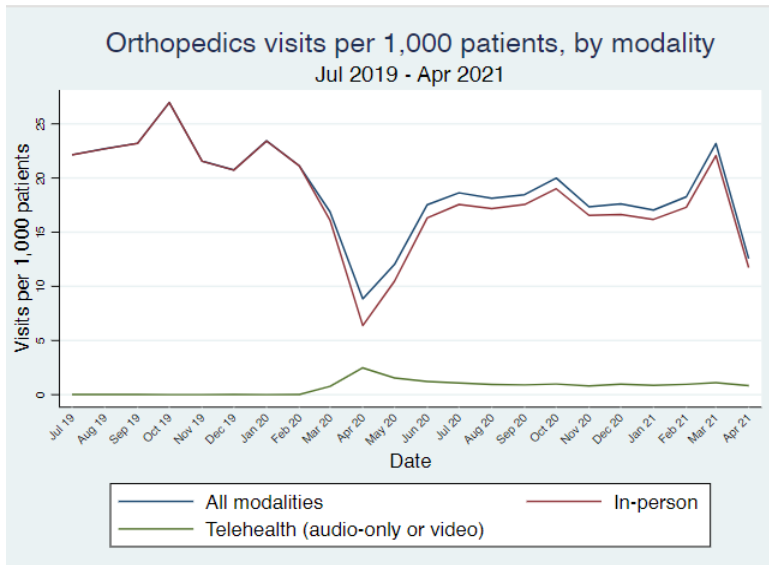

\*Orthopedics visits reported by 4/8 organizations, denominator = 460,821
